# Supplementary material
Source: bioRxiv or medRxiv preprint supplement (https://www.biorxiv.org/highwire/filestream/129696/field_highwire_adjunct_files/2/168260-3.pdf)
Supplement: Supplementary file [file 168260-3.pdf]

Number of Nuc. Mutations

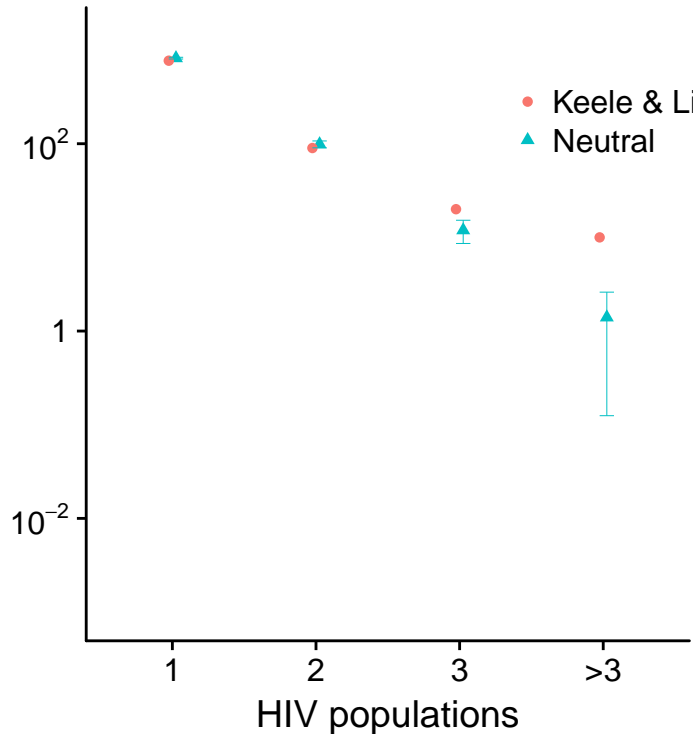

● Keele & Li  
▲ Neutral

1 2 3 >3

HIV populations
